# Supplementary material for: Malaria oocysts require circumsporozoite protein to evade mosquito immunity
Source: Nat Commun. 2022 Jun 9;13:3208. doi: 10.1038/s41467-022-30988-z (PMC9184642; doi:10.1038/s41467-022-30988-z)
Supplement: Supplementary file 1 — Supplementary Information [file 41467_2022_30988_MOESM1_ESM.pdf]

## Supplementary information

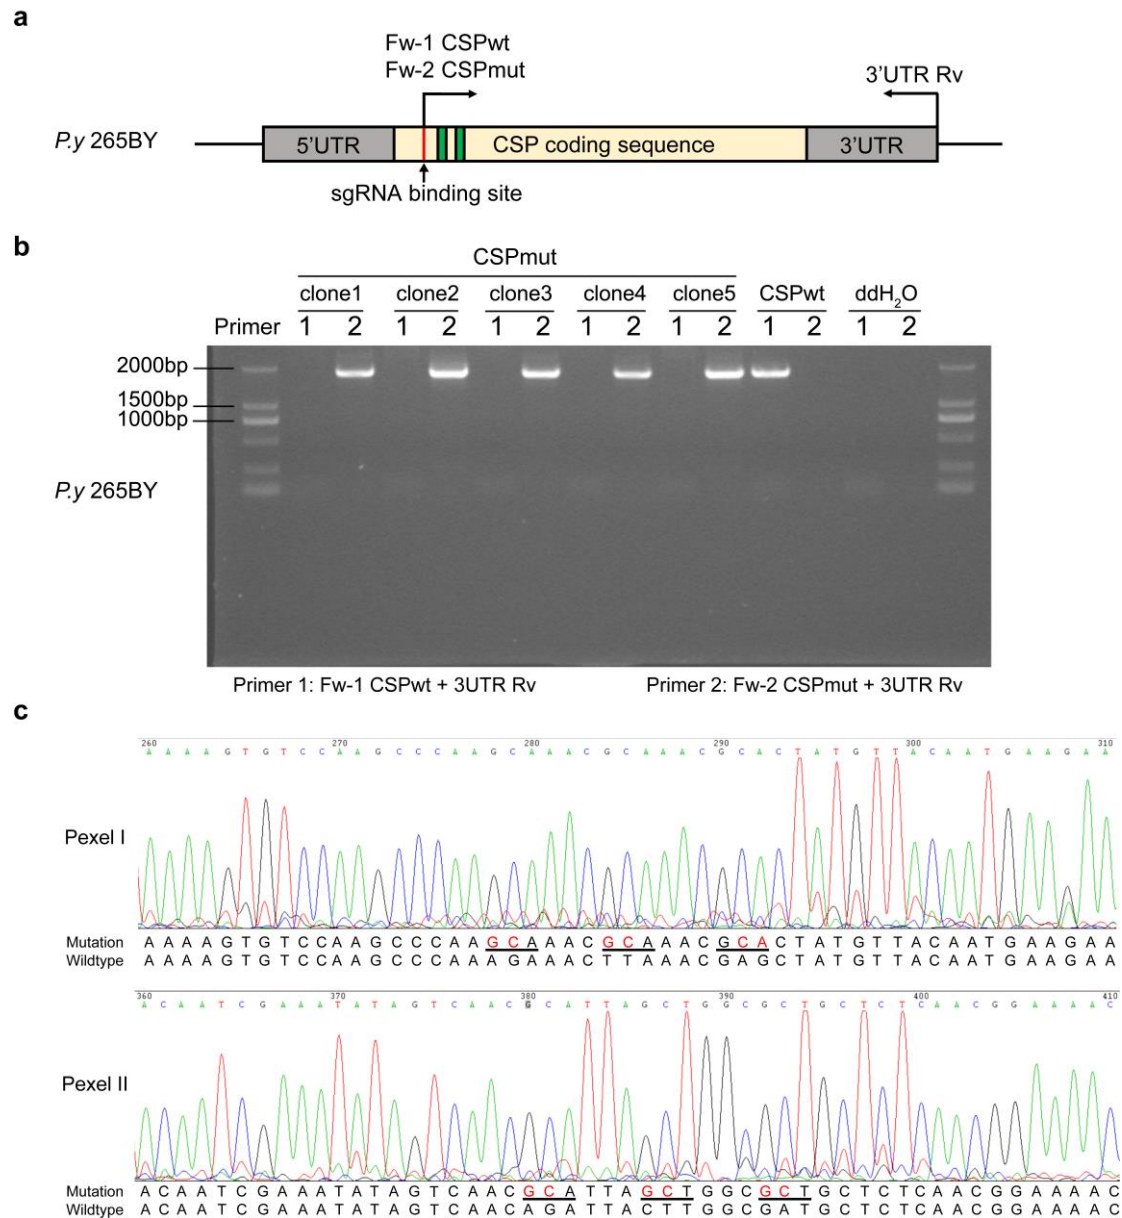

**Supplementary Figure 1. Identification of *P. yoelii* CSP<sub>mut</sub> parasite clones.**

**a** Primers designed to identify WT and mutant parasites. **b** ~2.0 kb fragment was amplified from the genomic DNA extracted from mutant parasites, with Primer 2 (Fw1-2 (Mut) and 3'-UTR Rv). No fragment was obtained with Primer 1 (Fw1-1 (WT) and 3'-UTR Rv). **c** The pyrimethamine-resistant parasites were collected and cloned by injecting each mouse with 100  $\mu$ L of PBS-diluted parasite solution containing ~1.0 infected RBC. The resulting *P. yoelii* CSP<sub>mut</sub> parasite clones were identified by PCR. **c** The CS gene of *P. yoelii* CSP<sub>mut</sub> parasites were amplified by PCR and sequenced. The underlined nucleic acid sequence indicates the successful pexel I/II domain mutation.

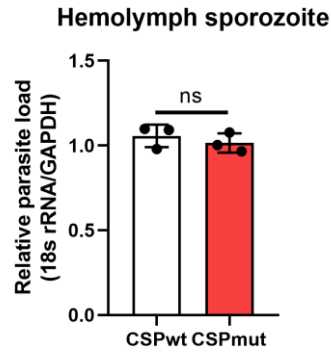

**Supplementary Figure 2. The parasite load of CSP<sub>wt</sub> and CSP<sub>mut</sub> hemolymph sporozoites in HepG2-CD81 cells.**  $1 \times 10^5$  HepG2-CD81 cells were infected with  $5 \times 10^4$  CSP<sub>wt</sub> or CSP<sub>mut</sub> hemolymph sporozoites from CSP<sub>wt</sub> or CSP<sub>mut</sub> parasite-infected mosquitoes (n = 30) for 42h. The parasite load was detected by qPCR. Three individual experiments have been performed. The data are presented as the means  $\pm$  SD, and a two-tailed Student's t-test was used to calculate statistical significance. ns, no significance. Source data are provided as a Source Data file.

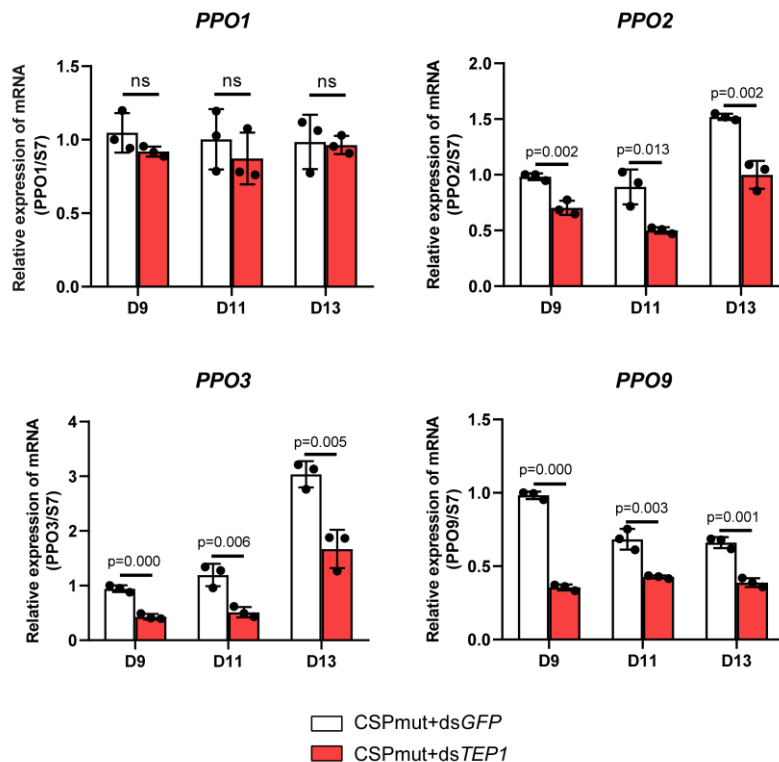

**Supplementary Figure 3. The effect of *TEP1* knockdown on the expression of *PPO1*, *PPO2*, *PPO3* and *PPO9* in CSP<sub>mut</sub> parasite-infected mosquitoes.** The mRNA levels of *PPO1*, *PPO2*, *PPO3* and *PPO9* in CSP<sub>mut</sub> parasite-infected mosquitoes (n=15) at the indicated time points were detected by

real-time PCR after *TEP1* was knockdown. Three individual experiments have been performed. The data are presented as the means  $\pm$  SD, and a two-tailed Student's t-test was used to calculate statistical significance. *p*-values are shown; ns, no significance. Source data are provided as a Source Data file.

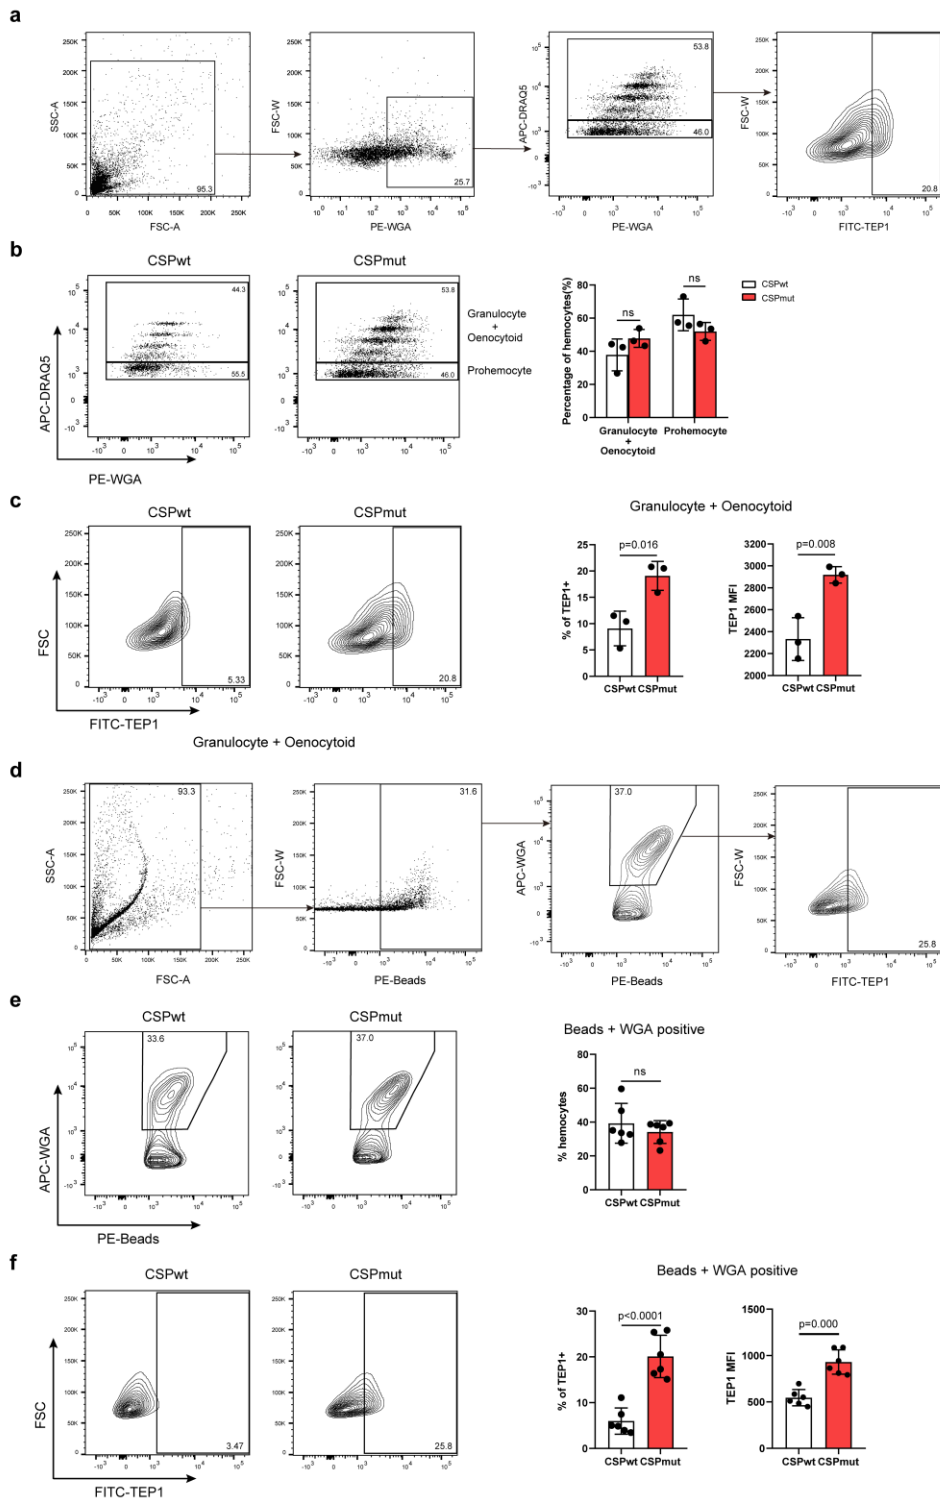

**Supplementary Figure 4. The expression of TEP1 in hemocytes of CSP<sub>wt</sub> and CSP<sub>mut</sub> parasite-infected mosquitoes.** Hemocytes collected from CSP<sub>wt</sub> or CSP<sub>mut</sub> parasites infected mosquitoes (n=60) at day 5 PI were stained with WGA, DRAQ5 and anti-TEP1 antibody conjugated with FITC, and then analyzed by FACS. **a** Gating strategy for flow cytometry with DRAQ5. **b** Representative FACS plot of three kinds of hemocytes from CSP<sub>wt</sub> or CSP<sub>mut</sub> parasite-infected mosquitoes (left), and the percentage of all three hemocytes from CSP<sub>mut</sub> parasite-infected mosquitoes was compared to those from CSP<sub>wt</sub> parasite-infected mosquitoes (right). **c** Representative FACS plot of TEP1 expression in granulocytes and oenocytoids from CSP<sub>wt</sub> or CSP<sub>mut</sub> parasite-infected mosquitoes (left), and the percentage of TEP1 positive granulocytes and oenocytoids, as well as the mean fluorescence intensity (MFI) of TEP1 were statistically analyzed (right). The experiment has been repeated for three times. **d** Gating strategy for flow cytometry with hemocytes phagocytosing of beads and expressing TEP1. **e** Representative FACS plot of bead-phagocytosed hemocytes from CSP<sub>wt</sub> or CSP<sub>mut</sub> parasite-infected mosquitoes (n=120) at day 5 PI (left), and the percentage of bead-phagocytosed hemocytes from CSP<sub>mut</sub> parasite-infected mosquitoes was compared to those from CSP<sub>wt</sub> parasite-infected mosquitoes (right). **f** Representative FACS plot of TEP1 expression in bead-phagocytosed hemocytes from CSP<sub>wt</sub> or CSP<sub>mut</sub> parasite-infected mosquitoes (left), and both the percentage and mean fluorescence intensity (MFI) of TEP1 in bead-phagocytosed hemocytes were statistically analyzed (right). The experiment has been repeated for three times. The data are presented as the means  $\pm$  SD, and a two-tailed Student's t-test was used for comparison of two groups. *p*-values are shown; ns, no significance. Source data are provided as a Source Data file.

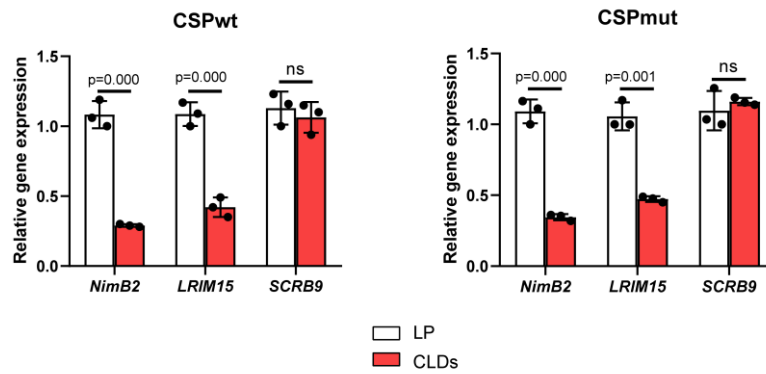

**Supplementary Figure 5. The effect of clodronate liposomes on the depletion of mosquito hemocytes.** Mosquitoes were injected with clodronate liposomes or the control liposomes (LP), and then were infected with CSP<sub>mut</sub> parasite, 24 h later, hemocytes were perfused from the mosquitoes (n=15), and the expression of cell marker, *NimB2* (hemocytes), *LRIM15* (granulocytes) and *SCR9* (oenocytoid) were determined by real-time PCR with *S7* as an internal control. The pooled data of three individual experiments was presented and analyzed. The data are presented as the means  $\pm$  SD, and a two-tailed Student's t-test was used for comparison of two groups. *p*-values are shown; ns, no significance. Source data are provided as a Source Data file.

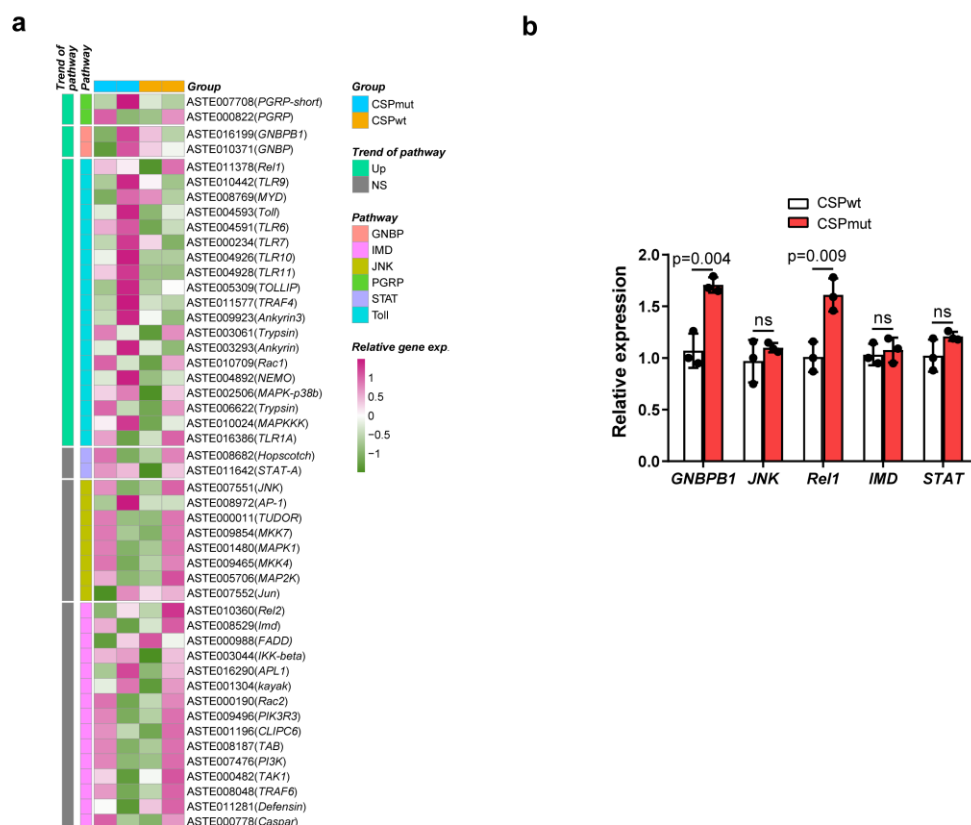

**Supplementary Figure 6. The changes of immune-related pathways and genes in CSP<sub>wt</sub> and CSP<sub>mut</sub> parasites-infected mosquitoes.**

**a** A heatmap comparing the differential expression of immune-related pathways and genes between CSP<sub>wt</sub> and CSP<sub>mut</sub> parasites-infected mosquitoes (n = 15) at day 7 PI; Up, upregulation, NS, no significance. Two biological repeats were performed. **b** Selected differentially expressed immune-related genes in both CSP<sub>wt</sub>- and CSP<sub>mut</sub>-infected mosquitoes (n = 15) at day 7 PI were validated using real-time PCR. This experiment was performed three times. The data are presented as the means  $\pm$  SD, and a two-tailed Student's t-test was used for comparison of two groups. *p*-values are shown; ns, no significance. Source data are provided as a Source Data file.

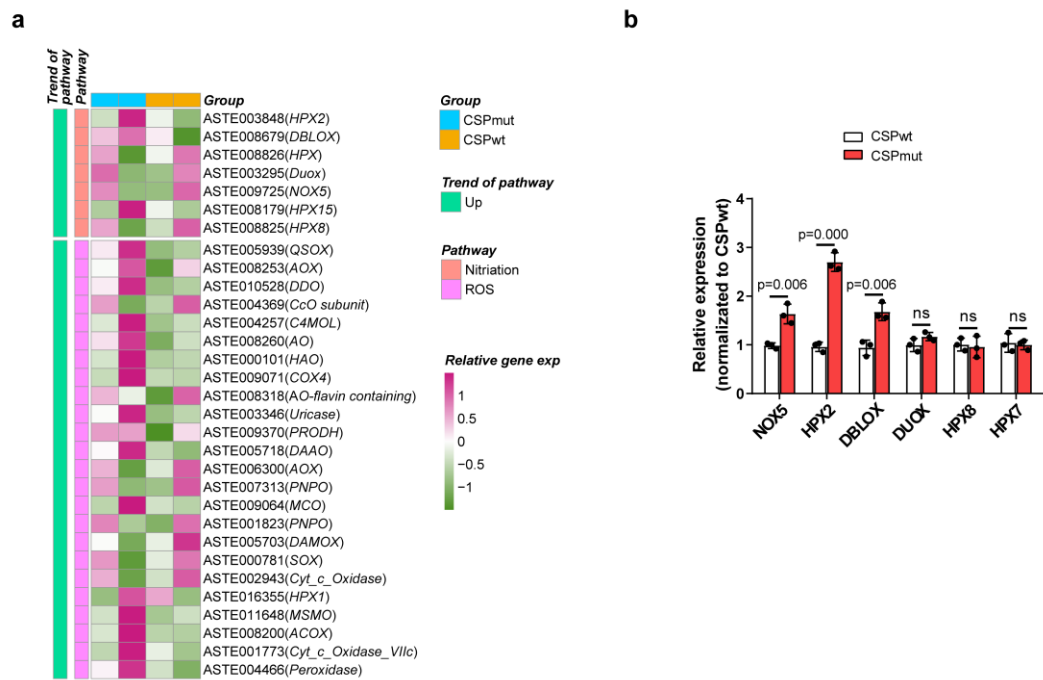

**Supplementary Figure 7. The changes of Nitration and ROS pathways and genes in CSP<sub>wt</sub> and CSP<sub>mut</sub> parasites-infected mosquitoes.**

**a** A heatmap of the differentially expressed reactive oxygen species, and nitration-related genes between WT and mutant parasite-infected mosquitoes (n=15) at day 7 PI, Up, upregulation, NS, no significance. Two biological repeats were performed. **b** The indicated differentially expressed genes in mosquitoes (n=15) infected with CSP<sub>wt</sub> or CSP<sub>mut</sub> at day 7 PI were validated by real-time PCR. The experiment was repeated three times. The data are presented as the means  $\pm$  SD, and a two-tailed Student's t-test was used for comparison of two groups. *p*-values are shown; ns, no significance. Source data are provided as a Source Data file.

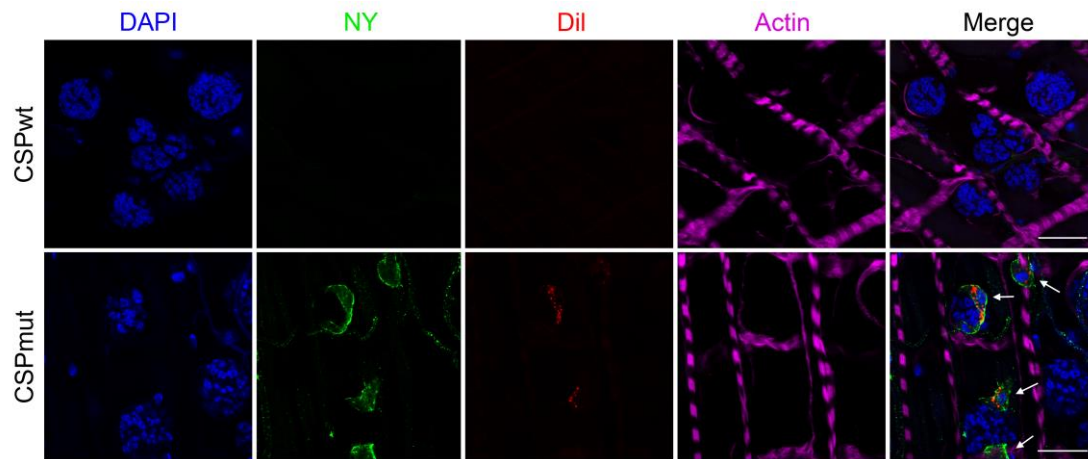

**Supplementary Figure 8. Hemocytes attached to the mutant oocyst in mosquitoes.** Mosquitoes were injected with Vybrant CM-Dil, and then infected with CSP<sub>wt</sub> and CSP<sub>mut</sub> parasites. At day 4 post infection, midguts were dissected from mosquitoes and fixed, and then stained with anti-nitrotyrosine, anti-Alexa Fluor 647 phalloidin and DAPI. The representative image of hemocytes attached to the mutant oocyst was presented. Experiment was performed twice. Scale bar 50  $\mu$ m.

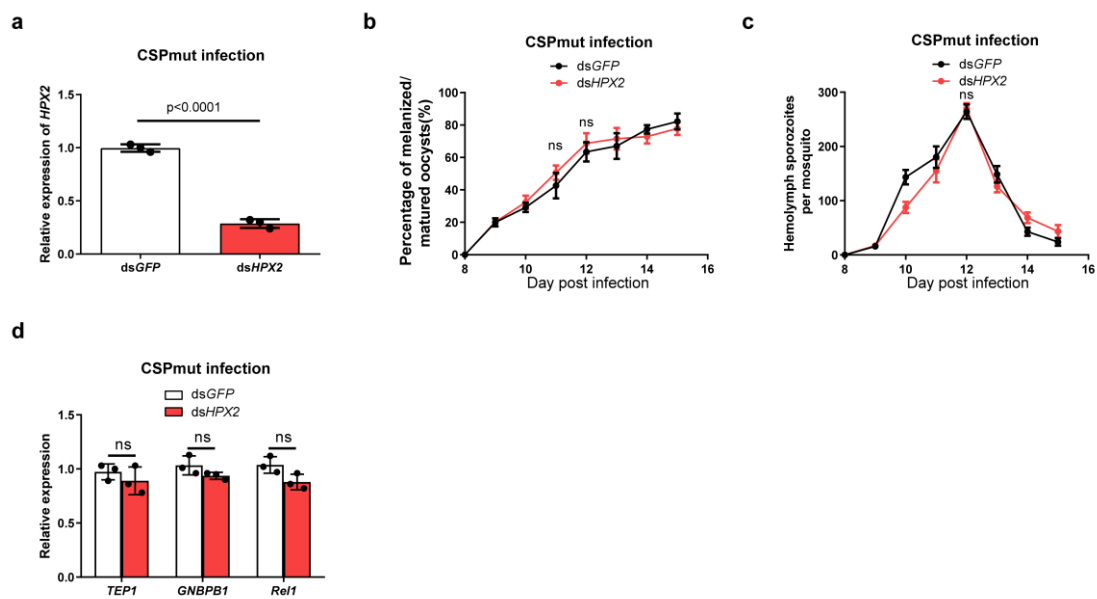

**Supplementary Figure 9. The effect of HPX2 knockdown on hemocyte nitration and CSP<sub>mut</sub>**

## development in mosquitoes.

**a** The efficacy of RNA silencing of *HPX2* was determined by real-time PCR, and the relative expression of *HPX2* in mosquitoes (n=15) was expressed as the ratio of *HPX2* to the *S7* internal control. **b-d** The percentage of melanized mature mutant oocysts (**b**) in *CSP<sub>mut</sub>* parasite-infected mosquitoes (n=24, pooled data), the number of hemolymph sporozoites (**c**) in *CSP<sub>mut</sub>* parasite-infected mosquitoes (n=30, pooled data), the expression of *TEP1*, *GNBP-B1* and *Rel1* (**d**) in *CSP<sub>mut</sub>* parasite-infected mosquitoes (n=15) at the indicated time points after *HPX2* knockdown. The experiments have been performed for two times. A two-tailed Student's t-test was used for comparison of two groups. The data are presented as the means  $\pm$  SD. *p*-values are shown; ns, no significance. Source data are provided as a Source Data file.

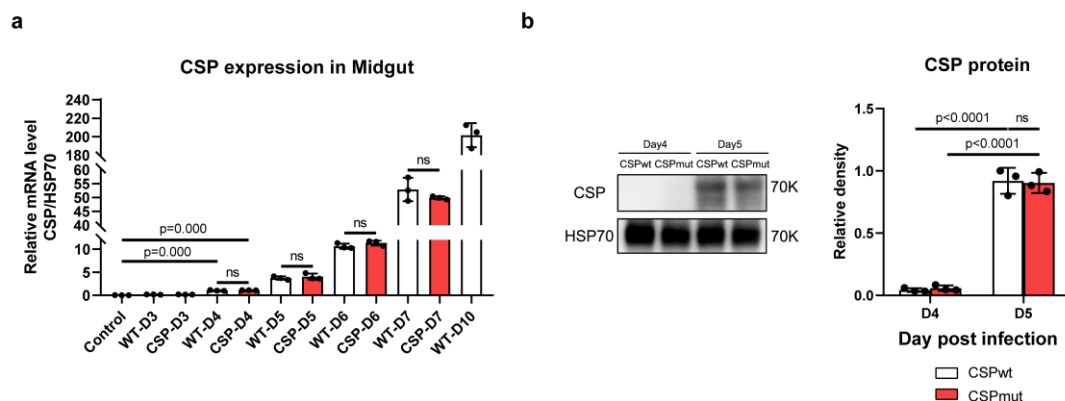

**Supplementary Figure 10. The expression of CSP in the midgut of the *CSP<sub>wt</sub>* and *CSP<sub>mut</sub>* infected mosquitoes.** **a.** The relative expression of *CSP* to *HSP70* in the oocysts of *CSP<sub>wt</sub>* and *CSP<sub>mut</sub>*-infected mosquitoes (n=15) at the indicated time points was determined by real-time PCR. **b.** The expression of *CSP* in the midgut of *CSP<sub>wt</sub>* and *CSP<sub>mut</sub>*-infected mosquitoes (n=40) at day 4 and 5 was detected by western blot, with *HSP70* as the internal control. The experiment was repeated for three times. A two-tailed Student's t-test was used for comparison of two groups. The data are presented as the means  $\pm$  SD. *p*-values are shown; ns, no significance. Source data are provided as a Source Data file.

Supplementary Movies

Supplementary Movie 1 (WT sporozoites)

Supplementary Movie 2 (Mut sporozoites)

Supplementary Tables

Supplementary Table 1

List of abbreviation and gene name in the heatmap comparing the differential expression of immune-related pathways genes and antioxidant genes

| Pathway | Gene Number | Abbreviation of Gene Name | Gene Name                                     | TPM (CSPmut1) | TPM (CSPmut2) | TPM (CSPwt1) | TPM (CSPwt2) | Mean (CSPmut) | Mean (CSPwt) | Fold change (mut/ wt) |
|---------|-------------|---------------------------|-----------------------------------------------|---------------|---------------|--------------|--------------|---------------|--------------|-----------------------|
| STAT    | ASTE011642  | STAT-A                    | signal transducer and transcription activator | 34.10         | 33.22         | 26.02        | 32.92        | 33.66         | 29.47        | <b>1.14</b>           |
|         | ASTE008682  | Hopscotch                 | tyrosine-protein kinase hopscotch             | 24.83         | 5.86          | 10.01        | 23.94        | 15.34         | 16.97        | 0.90                  |
| JNK     | ASTE007552  | Jun                       | c-Jun N-terminal kinase                       | 0.80          | 1.82          | 1.59         | 1.70         | 1.31          | 1.65         | 0.80                  |
|         | ASTE005706  | MAP2K                     | Mitogen-activated protein kinase kinase       | 49.88         | 21.87         | 26.38        | 61.15        | 35.87         | 43.77        | 0.82                  |
|         | ASTE009465  | MKK4                      | mitogen-activated protein kinase kinase 4     | 56.26         | 20.90         | 29.96        | 54.76        | 38.58         | 42.36        | 0.91                  |
|         | ASTE001480  | MAPK1                     | mitogen-activated protein kinase 1            | 62.63         | 18.52         | 25.93        | 64.13        | 40.57         | 45.03        | 0.90                  |
|         | ASTE009854  | MKK7                      | mitogen-activated protein kinase kinase 7     | 44.81         | 16.59         | 11.10        | 44.90        | 30.70         | 28.00        | <b>1.10</b>           |
|         | ASTE000011  | TUDOR                     | TUDOR-domain protein                          | 42.05         | 17.83         | 17.31        | 42.81        | 29.94         | 30.06        | 1.00                  |
|         | ASTE008972  | AP-1                      | Activating protein-1                          | 26.82         | 34.25         | 27.83        | 27.87        | 30.54         | 27.85        | <b>1.10</b>           |
|         | ASTE007551  | JNK                       | c-Jun N-terminal kinase                       | 38.11         | 12.52         | 17.34        | 42.57        | 25.32         | 29.95        | 0.85                  |
|         | ASTE000190  | Rac2                      | Rac family small GTPase 2                     | 22.73         | 3.85          | 9.83         | 21.44        | 13.29         | 15.64        | 0.85                  |
|         | ASTE010709  | Rac1                      | Rac family small GTPase 1                     | 39.60         | 23.61         | 13.14        | 34.51        | 31.60         | 23.83        | <b>1.33</b>           |
|         | ASTE010024  | MAPKKK                    | Mitogen activated protein kinase-like protein | 31.34         | 41.83         | 20.09        | 28.44        | 36.58         | 24.27        | <b>1.51</b>           |
|         | ASTE002506  | MAPK-p38b                 | p38b MAP kinase                               | 56.19         | 61.14         | 40.06        | 56.66        | 58.67         | 48.36        | <b>1.21</b>           |
| PGRP    | ASTE000822  | PGRP                      | Peptidoglycan-recognition protein             | 381.73        | 80.26         | 102.83       | 330.32       | 230.99        | 216.58       | <b>1.07</b>           |
|         | ASTE007708  | PGRP (short)              | Peptidoglycan recognition protein (short)     | 41.09         | 51.56         | 42.51        | 40.79        | 46.32         | 41.65        | <b>1.11</b>           |
| IMD     | ASTE000778  | Caspar                    | Caspar                                        | 125.28        | 58.57         | 46.11        | 111.51       | 91.93         | 78.81        | <b>1.17</b>           |
|         | ASTE011281  | Defensin                  | Defensin                                      | 5858.49       | 2619.29       | 6819.00      | 8384.31      | 4238.89       | 7601.66      | 0.56                  |
|         | ASTE008048  | TRAF                      | TNF-receptor-associated factor                | 46.39         | 16.77         | 26.92        | 52.45        | 31.58         | 39.69        | 0.80                  |

|             |            |                    |                                                           |         |         |         |        |         |         |             |
|-------------|------------|--------------------|-----------------------------------------------------------|---------|---------|---------|--------|---------|---------|-------------|
|             | ASTE000482 | TAK1               | TGF-beta activated kinase 1                               | 28.01   | 18.78   | 26.01   | 32.75  | 23.40   | 29.38   | 0.80        |
|             | ASTE007476 | PI3K               | phosphatidylinositol-4,5-bisphosphate<br>3-kinase         | 26.08   | 13.34   | 14.34   | 27.30  | 19.71   | 20.82   | 0.95        |
|             | ASTE008187 | TAB                | TAK1-associated binding protein                           | 37.27   | 17.31   | 21.04   | 38.70  | 27.29   | 29.87   | 0.91        |
|             | ASTE001196 | CLIPG6             | serine protease persephone                                | 65.16   | 55.00   | 49.47   | 67.29  | 60.08   | 58.38   | <b>1.03</b> |
|             | ASTE009496 | PIK3R3             | phosphoinositide-3-kinase, regulatory<br>subunit          | 19.03   | 5.26    | 8.77    | 20.08  | 12.15   | 14.42   | 0.84        |
|             | ASTE001304 | kayak (kay)        | Transcription factor kayak                                | 30.88   | 37.80   | 23.63   | 36.27  | 34.34   | 29.95   | <b>1.15</b> |
|             | ASTE016290 | APL1               | Anopheles Plasmodium-responsive<br>leucine-rich repeat 1  | 105.02  | 210.61  | 92.04   | 169.23 | 157.82  | 130.63  | <b>1.21</b> |
|             | ASTE003044 | IKK-beta           | I-kappaB kinase beta                                      | 18.48   | 18.64   | 16.56   | 18.42  | 18.56   | 17.49   | <b>1.06</b> |
|             | ASTE000988 | FADD               | Fas-Associated Death Domain                               | 8.90    | 12.73   | 14.66   | 11.75  | 10.81   | 13.20   | 0.82        |
|             | ASTE008529 | Imd                | Immune Deficiency (Imd)                                   | 30.56   | 13.02   | 22.20   | 35.90  | 21.79   | 29.05   | 0.75        |
|             | ASTE010360 | Rel2               | NF-kappaB Relish-like transcription<br>factor             | 22.56   | 23.97   | 23.07   | 25.30  | 23.27   | 24.18   | 0.96        |
| <b>GNBP</b> | ASTE010371 | GNBP               | beta-1,3-glucan-binding protein                           | 5.36    | 15.34   | 12.03   | 10.38  | 10.35   | 11.21   | 0.92        |
|             | ASTE016199 | GNBPB1             | beta-1,3-glucan-binding protein B1                        | 80.51   | 124.99  | 108.96  | 89.62  | 102.75  | 99.29   | <b>1.03</b> |
| <b>Toll</b> | ASTE016386 | TLR1A              | TOLL-like receptor 1A                                     | 44.44   | 13.87   | 27.83   | 51.17  | 29.15   | 39.50   | 0.74        |
|             | ASTE006622 | Trypsin            | Trypsin serine proteases                                  | 18.84   | 14.62   | 12.67   | 17.96  | 16.73   | 15.32   | <b>1.09</b> |
|             | ASTE004892 | NEMO               | Nuclear factor kappa B essential<br>modulator             | 72.01   | 112.85  | 58.23   | 70.56  | 92.43   | 64.39   | <b>1.44</b> |
|             | ASTE003293 | Ankyrin            | Ankyrin                                                   | 4.22    | 6.99    | 4.21    | 3.09   | 5.60    | 3.65    | <b>1.53</b> |
|             | ASTE003061 | Trypsin            | Trypsin                                                   | 14.47   | 11.82   | 9.04    | 14.21  | 13.15   | 11.63   | <b>1.13</b> |
|             | ASTE009923 | Ankyrin3           | Ankyrin                                                   | 11.65   | 22.40   | 13.89   | 9.09   | 17.03   | 11.49   | <b>1.48</b> |
|             | ASTE011577 | TRAF4              | TNF Receptor-Associated Factor4                           | 0.05    | 2.57    | 0.29    | 0.06   | 1.31    | 0.18    | <b>7.34</b> |
|             | ASTE005309 | TOLLIP             | Toll-interacting protein                                  | 44.90   | 65.08   | 45.79   | 51.74  | 54.99   | 48.76   | <b>1.13</b> |
|             | ASTE004928 | TLR11              | Toll-like receptor 11                                     | 2.41    | 3.22    | 1.44    | 1.41   | 2.81    | 1.43    | <b>1.97</b> |
|             | ASTE004926 | TLR10              | Toll-like receptor 10                                     | 0.63    | 1.14    | 0.47    | 0.47   | 0.88    | 0.47    | <b>1.88</b> |
|             | ASTE000234 | TLR7               | Toll-like receptor 7                                      | 0.57    | 1.57    | 1.00    | 0.29   | 1.07    | 0.64    | <b>1.66</b> |
|             | ASTE004591 | TLR6               | Toll-like receptor 6                                      | 0.48    | 0.62    | 0.07    | 0.25   | 0.55    | 0.16    | <b>3.48</b> |
|             | ASTE004593 | Toll               | Toll                                                      | 0.12    | 0.34    | 0.03    | 0.12   | 0.23    | 0.07    | <b>3.10</b> |
|             | ASTE008769 | MYD                | Myeloid differentiation primary<br>response protein MyD88 | 10.16   | 17.35   | 16.48   | 11.74  | 13.75   | 14.11   | 0.97        |
|             | ASTE010442 | TLR9               | Toll-like receptor 9                                      | 0.86    | 10.93   | 4.46    | 0.41   | 5.89    | 2.43    | <b>2.42</b> |
|             | ASTE011378 | Rel1               | NF-kappaB Relish-like transcription<br>factor             | 96.00   | 89.54   | 55.64   | 107.53 | 92.77   | 81.58   | <b>1.14</b> |
| <b>ROS</b>  | ASTE004466 | Peroxidase         | Peroxidase                                                | 3.06    | 5.09    | 2.37    | 1.28   | 4.08    | 1.82    | <b>2.24</b> |
|             | ASTE001773 | Cyt_c_Oxidase_VIIc | cytochrome c oxidase VIIc                                 | 1074.56 | 2125.26 | 1260.30 | 944.85 | 1599.91 | 1102.58 | <b>1.45</b> |
|             | ASTE008200 | ACOX               | Acyl-CoA oxidase                                          | 18.18   | 46.11   | 14.33   | 13.34  | 32.14   | 13.84   | <b>2.32</b> |
|             | ASTE011648 | MSMO               | Methylsterol monooxygenase                                | 41.22   | 71.88   | 35.17   | 40.65  | 56.55   | 37.91   | <b>1.49</b> |
|             | ASTE016355 | HPX1               | Heme peroxidase 1                                         | 0.00    | 0.16    | 0.11    | 0.00   | 0.08    | 0.06    | <b>1.39</b> |
|             | ASTE002943 | Cyt_c_Oxidase      | Cytochrome C oxidase                                      | 115.52  | 63.78   | 89.32   | 131.63 | 89.65   | 110.48  | 0.81        |

|                   |            |                                          |                                                  |         |        |        |         |             |             |             |
|-------------------|------------|------------------------------------------|--------------------------------------------------|---------|--------|--------|---------|-------------|-------------|-------------|
|                   | ASTE000781 | FAD-linked<br>SOX                        | Sulfhydryl oxidase                               | 56.66   | 22.24  | 41.36  | 60.45   | 39.45       | 50.90       | 0.77        |
|                   | ASTE005703 | DAMOX                                    | D-amino acid oxidase                             | 18.85   | 12.34  | 17.97  | 26.93   | 15.60       | 22.45       | 0.69        |
|                   | ASTE001823 | PNPO                                     | Pyridoxamine-phosphate oxidase                   | 58.06   | 36.34  | 31.22  | 60.07   | 47.20       | 45.65       | <b>1.03</b> |
|                   | ASTE009064 | MCO                                      | Multicopper oxidases                             | 2.51    | 44.07  | 6.07   | 1.87    | 23.29       | 3.97        | <b>5.87</b> |
|                   | ASTE007313 | PNPO                                     | pyridoxamine 5'-phosphate oxidase                | 41.17   | 26.01  | 27.38  | 45.57   | 33.59       | 36.48       | 0.92        |
|                   | ASTE006300 | AOX3                                     | Acyl-coenzyme A oxidase                          | 77.25   | 35.90  | 59.51  | 90.06   | 56.57       | 74.78       | 0.76        |
|                   | ASTE005718 | DAAO                                     | D-amino-acid oxidase                             | 124.04  | 212.12 | 90.11  | 63.47   | 168.08      | 76.79       | <b>2.19</b> |
|                   | ASTE009370 | PRODH                                    | Proline dehydrogenase                            | 184.33  | 182.29 | 60.86  | 159.75  | 183.31      | 110.30      | <b>1.66</b> |
|                   | ASTE003346 | Uricase                                  | Uricase                                          | 61.49   | 146.49 | 13.21  | 31.75   | 103.99      | 22.48       | <b>4.63</b> |
|                   | ASTE008318 | Amine oxidase<br>(flavin-<br>containing) | Flavin-containing amine oxidase                  | 11.69   | 11.11  | 10.00  | 12.21   | 11.40       | 11.10       | <b>1.03</b> |
|                   | ASTE009071 | COX4                                     | Cytochrome c oxidase, subunit<br>Vb/COX4         | 215.77  | 421.22 | 211.90 | 205.49  | 318.49      | 208.69      | <b>1.53</b> |
|                   | ASTE000101 | HAO                                      | (S)-2-hydroxy-acid oxidase                       | 14.84   | 69.81  | 5.90   | 9.12    | 42.32       | 7.51        | <b>5.64</b> |
|                   | ASTE008260 | AO                                       | Amine oxidase                                    | 14.03   | 16.84  | 10.79  | 12.54   | 15.44       | 11.66       | <b>1.32</b> |
|                   | ASTE004257 | C4MOL                                    | C-4 methylsterol oxidase                         | 3.27    | 11.50  | 0.90   | 2.54    | 7.39        | 1.72        | <b>4.30</b> |
|                   | ASTE004369 | CcO subunit                              | Cytochrome c oxidase assembly<br>protein subunit | 55.97   | 42.89  | 46.95  | 59.08   | 49.43       | 53.02       | 0.93        |
|                   | ASTE010528 | DDO                                      | D-aspartate oxidase                              | 50.63   | 104.46 | 9.16   | 19.00   | 77.55       | 14.08       | <b>5.51</b> |
|                   | ASTE008253 | AOX                                      | Acyl-coenzyme A oxidase                          | 0.04    | 0.07   | 0.00   | 0.05    | 0.05        | 0.02        | <b>2.31</b> |
|                   | ASTE005939 | SOX                                      | Sulfhydryl oxidase                               | 75.96   | 100.78 | 55.55  | 60.81   | 88.37       | 58.18       | <b>1.52</b> |
| <b>Nitriation</b> | ASTE008825 | HPX8                                     | Heme peroxidase 8                                | 1647.32 | 407.10 | 958.89 | 1958.72 | 1027.2<br>1 | 1458.8<br>0 | 0.70        |
|                   | ASTE008179 | HPX15                                    | Heme peroxidase 15                               | 0.31    | 9.68   | 2.68   | 0.14    | 4.99        | 1.41        | <b>3.55</b> |
|                   | ASTE009725 | NOX5                                     | NADH/NADPH oxidase and related<br>proteins       | 23.77   | 7.97   | 8.20   | 26.24   | 15.87       | 17.22       | 0.92        |
|                   | ASTE003295 | Duox                                     | Dual oxidase                                     | 88.93   | 12.45  | 18.55  | 82.26   | 50.69       | 50.41       | <b>1.01</b> |
|                   | ASTE008826 | HPX                                      | Heme peroxidase                                  | 111.37  | 40.76  | 86.50  | 122.00  | 76.07       | 104.25      | 0.73        |
|                   | ASTE00679  | DBLOX                                    | Double heme peroxidase                           | 6.92    | 7.93   | 6.40   | 3.54    | 7.42        | 4.97        | <b>1.49</b> |
|                   | ASTE003848 | HPX2                                     | Heme peroxidase 2                                | 49.64   | 111.62 | 58.89  | 31.96   | 80.63       | 45.42       | <b>1.78</b> |

**Note:** The name of pathway in bold indicated that was upregulated for more than 1 fold in CSP<sub>mut</sub>-infected mosquitoes, and the numbers of the upregulated fold of the related genes were also indicated as in bold.

**Supplementary Table 2. The effect of knockdown of candidate genes on the melanization of mature mutant oocyst**

| Candidate Gene | <i>JNK</i> | <i>STAT</i> | <i>IMD</i> | <i>HPX2</i> | <i>DBLOX</i> | <i>DUOX</i> |
|----------------|------------|-------------|------------|-------------|--------------|-------------|
| Day10          | 31.4%      | 28.5%       | 0          | 54.5%       | 54.5%        | 73.4%       |
| Day12          | 62.5%      | 66.7%       | 85.7%      | 66.6%       | 53.8%        | 76.4%       |
| Day14          | 65.4%      | 85.7%       | 66.7%      | 65.7%       | 68.3%        | 84.6%       |

**Note:** “%” is the percentage of melanized mature mutant oocyst in the CSP<sub>mut</sub> parasite-infected mosquitoes after the indicated genes was knockdown.

**Supplementary Table 3.****List of primers used for Real time PCR analysis and for dsRNA synthesis**

| Primer Name | Primer Sequence (sequences are indicated from 5'to 3') |
|-------------|--------------------------------------------------------|
| S7-QF       | TCGGTTCCAAGGTGATCAAAGC                                 |
| S7-QR       | AGCGCGGTCTCTTCTGCTTGT                                  |
| HSP70-QF    | TGAAGCTGTATGCTCTCCAATTA                                |
| HSP70-QR    | AGTTCATTCCTCCTGGCATTTC                                 |
| EGFP-T7F    | TAATACGACTCACTATAGGTCAAGTTCAACGTGTCCGGCG               |
| EGFP-T7R    | TAATACGACTCACTATAGGAGGACCATTGATCGCGCTT                 |
| TEP1- QF    | AACTCGCAGGACATCAACATCACC                               |
| TEP1- QR    | GGACGCTTCAGTGCCACCTTG                                  |
| TEP1 -T7F   | TAATACGACTCACTATAGGAAGTCGCAGGACATCAACATCACC            |
| TEP1 -T7R   | TAATACGACTCACTATAGGGGACGCTTCAGTGCCACCTTG               |
| Rel1- QF    | GCTGTGCGAGAAGGTGGTGAAG                                 |
| Rel1- QR    | GGTGGCGTTCGGAAACTGATGG                                 |
| Rel1- T7F   | TAATACGACTCACTATAGGATCTGGTCGGTAAGGAGGGC                |
| Rel1- T7R   | TAATACGACTCACTATAGGGGTTCCGTAAAGCGTCCTCG                |
| IMD-QF      | GTGGTGGTGGTGGAGGAGGAG                                  |
| IMD-QR      | GGTGGTAGGCGTGTCGTTGAAC                                 |
| IMD-T7F     | TAATACGACTCACTATAGGGCCTCCTTCAGCTACACGAC                |
| IMD-T7R     | TAATACGACTCACTATAGGGTCGGTTCGCGGTTCAACT                 |
| JNK-QF      | GGGCACGGTGTGGGAGTTTAAG                                 |
| JNK-QR      | GTGTACGCTGCGGAGTGAACG                                  |
| JNK-T7F     | TAATACGACTCACTATAGGCAAGCATCTCCACTCGGCTG                |
| JNK-T7R     | TAATACGACTCACTATAGGTTTCGCACGGTTGGCTGTAA                |
| STAT-QF     | GAGGTGACGGAGGTGTTCAATGC                                |
| STAT-QR     | ATCAGGTTGCGGTTGTCGTTCTC                                |
| STAT-T7F    | TAATACGACTCACTATAGGGCGGAGACGAACTTCACCATTAAAGA          |
| STAT-T7R    | TAATACGACTCACTATAGGGGTTAATCTTCCACTGCGACAGATACTT        |
| GNBPB1- QF  | GTCGGCAATCGGCAGCACATAG                                 |
| GNBPB1- QR  | CTTCGGCAGCAACCAGATGGC                                  |
| GNBPB1- T7F | TAATACGACTCACTATAGGACCAACAATCGGTCCAACCTCGTTC           |
| GNBPB1-T7R  | TAATACGACTCACTATAGGGTTCCTTCGTGAGCGTGGTCGTC             |
| NOX5-QF     | CAAGAAGCGGGAGCGTATGATGG                                |
| NOX5-QR     | GTAAGCCAGACCGAGCGATTGAAG                               |
| NOX5-T7F    | TAATACGACTCACTATAGGAAGGATGCCGAGGAAGGTGC                |
| NOX5-T7R    | TAATACGACTCACTATAGGCGTCGGTGGAATTCGCTCG                 |
| HPX2-QF     | ACCTACGCTGTCCTGTCTTATCCG                               |
| HPX2-QR     | GCTGCACTGTACTCCGCCAAC                                  |
| HPX2-T7F    | TAATACGACTCACTATAGGCTCCGAGCGTCCTCCTTCTTC               |
| HPX2-T7R    | TAATACGACTCACTATAGGGGGATCGTCTTCGGGGACC                 |
| DBLOX-QF    | GCGGTGGATACTTCAGCGGATAC                                |

|                          |                                         |
|--------------------------|-----------------------------------------|
| DBLOX-QR                 | CGGTGGAAGCATCGTGAGGAAC                  |
| DBLOX-T7F                | TAATACGACTCACTATAGGGCGAGGTGACGAACCATCTG |
| DBLOX-T7R                | TAATACGACTCACTATAGGAGCTGCTCGCTGCATATCAC |
| DUOX-QF                  | CGAGATAGTCATGGCGTCCGAATC                |
| DUOX-QR                  | GCACGGTGGAAACGGTATGTAGC                 |
| DUOX-T7F                 | TAATACGACTCACTATAGGGGACGGTGAGGTAATGACGG |
| DUOX-T7R                 | TAATACGACTCACTATAGGAGTCACGCTTGTGGTTCGAG |
| PPO1-QF                  | GGTCAACTTCCTCACGCCCAAC                  |
| PPO1-QR                  | CCTGCCAGCATATAGACGGATAAGC               |
| PPO2-QF                  | AGTCAGACCAACCGTGCCTACC                  |
| PPO2-QR                  | GCCACCGTTCGAGATCGTTCAC                  |
| PPO3-QF                  | GCAGGCGGAGAACAGAATGACC                  |
| PPO3-QR                  | CCAGATGCCAGTGCCAGTGATG                  |
| PPO9-QF                  | GACGCTACGGTACAGATAACGAGTG               |
| PPO9-QR                  | CGTGCTGGATGTGGGTAAAGGTC                 |
| NimB2-QF                 | TACCGCTGGGCAATGGATCAAATC                |
| NimB2-QR                 | CTCGCATACGGGCTCACACTTG                  |
| LRIM15-QF                | GTCCTAACGCTGAACCACAATTTGC               |
| LRIM15-QR                | GCCACGATTGATGCCGATCCTC                  |
| SCRB9-QF                 | GACTAGCGATGGCGAGCATTATGG                |
| SCRB9-QR                 | CTTGAGCAGCGGATCTTCGTAGC                 |
| CSP-QF                   | ACAACAGCCACCACAACAAC                    |
| CSP-QR                   | CACTACATTGAGACCATTCTCTG                 |
| 18s rRNA-QF              | GCAGCAACGGCTCCATGACTC                   |
| 18s rRNA-QR              | CTCCTCCTGGTAGATGTGGTCCTC                |
| Probe for 18s rRNA       | FAM-AACCTTCCCAAAAAT-MGB                 |
| human GAPDH-QF           | GGACCTGACCTGCCGTCTAG                    |
| human GAPDH-QR           | CCTGCTTCACCACCTTCTTGA                   |
| Probe for human<br>GAPDH | FAM-AACCTGCCAAATATGATGAC-MGB            |

**Supplementary Table 4****Polypeptide and antigenic sequence designed for the preparation of polyclonal antibodies**

| Sequence Name       | Sequence                                                                                                                                                                                                                                                                                                                                                                                                                                                                                                                                                                                                                                                                                                                                                                       |
|---------------------|--------------------------------------------------------------------------------------------------------------------------------------------------------------------------------------------------------------------------------------------------------------------------------------------------------------------------------------------------------------------------------------------------------------------------------------------------------------------------------------------------------------------------------------------------------------------------------------------------------------------------------------------------------------------------------------------------------------------------------------------------------------------------------|
| anti-CSP-N-terminal | LNSKNGKIYNRN                                                                                                                                                                                                                                                                                                                                                                                                                                                                                                                                                                                                                                                                                                                                                                   |
| anti-CSP-C-terminal | KNV NKQPENLTLE                                                                                                                                                                                                                                                                                                                                                                                                                                                                                                                                                                                                                                                                                                                                                                 |
| anti-CSP-repeat     | QGP GAPQGP GAP-QGP GAPQGP GAP- QGP GAPQGP GAP                                                                                                                                                                                                                                                                                                                                                                                                                                                                                                                                                                                                                                                                                                                                  |
| anti-TEP1           | LAEKISPSRNDYTITLKYKRSVRNFYINSQDINITSYEDIPEDTRALEVNVGGIGFGLL<br>QVIYQYSLNLVNF AHRFKLDLERQSTGSEYELMRVCANFIPKMTDSRS                                                                                                                                                                                                                                                                                                                                                                                                                                                                                                                                                                                                                                                               |
| anti-HSP70          | MANAKASKPNLPESNIAIGIDL GTTYS CVGVWRNENVDIIANDQGNRTTPSYVA<br>FTDTERLIGDAAKNQVARNPENTV FDAKRLIGRKFT ESSVQSDMKHWPFTVKSG<br>IEEKPMIEVVYQGEKKLFHP EEISSMVLQMKKENAE AFLGKSIKNAVITVPAYFND<br>SQRQATKDAGTIAGLNVMRIINEPTAAAIAYGLHKKGKG EKNILIFDLGGGTFDVS<br>LLTIEDGIFEVKATAGDTHLGGEDFDNRLVNFCVEDFKRKNRGKDL SKNSRALRRL<br>RTQCERAKRTLSSSTQATIEIDSLFEGIDYSVT VSRARFEELCIDYFRD TLIPVEKVLK<br>DAMMDKKS VHEVVLVGGSTRIPKIQT LIKEFFNGKEACRSINPDEAVAYGA AVQ<br>AAILSGDQSN AVQDLLLLDVCSLSLGLETAGGVMTK LIERN TTIPAKKSQIFTTYAD<br>NQPGVLIQVYEGERALTKDNNLLGKFHLDGIPPAPRKVPQIEVTFDIDANGILNVT<br>AVEKSTGKQNHITITNDKGRLSPEEIDRMVNDAEKYKA EDEENKKRIEARN SLEN<br>YCYGVKSSLEDQKI KEKLQPN EVETCMKSVTSILEWLEKNQLAGKDEYEAKQKEA<br>EAVCSPIMSKIYQDAGAAAGGMPGGMPGGMPGGMPGGMPGGMNFPGGM<br>PGGMGAPAGAPAGSGPTVEEVD |
| anti-S7             | MVFGSKVIKAGNGEPDAFETQIGQAILELEMNSDLKPQLRDLYITRAREVEFNK<br>KAI IYVPVPKQKAFQKVQTRLVRELEKKFSGKHVV FIAERRILPKPMRGR RDPNK<br>QKRPRSRTLTA VYDAILEDLVFPAEVVGKRIRVKLDGSQLIKVHLDKNQQT TIEHK<br>VDTFASVYK KLTGRDVTFEFPENYL                                                                                                                                                                                                                                                                                                                                                                                                                                                                                                                                                               |

**Supplementary methods****The expression difference of TEP1 in hemocytes determined by flow cytometry**

According to the methods previously described<sup>1,2</sup>, hemolymph was perfused from CSP<sub>wt</sub> or CSP<sub>mut</sub>-infected mosquito (n=60) at 5 day post-feeding. Collected hemolymph was washed with 1× PBS to a final volume of 1 mL, then centrifuged at 2000g for 5 min to pellet cells. After removing the supernatant, cells were washed two times in 1× PBS with an additional centrifugation step of 5 min at 2000g between washing steps. For DRAQ5 staining, cells were incubated with WGA Alexa Fluor 555 (1:5000, invitrogen) and DRAQ5 (1:1000, Thermo Fisher Scientific) for 60 min in the dark at room temperature. For phagocytic assay of fluorescent FluoSpheres, CSP<sub>wt</sub> or CSP<sub>mut</sub>-infected mosquito (n=60) at 4 day PI were injected with red fluorescent FluoSpheres (1 μm; Molecular Probes) at a final concentration of 2% (vol/vol). The next day, hemocytes were collected by perfusion and incubated with WGA Alexa Fluor 647 (1:5000, invitrogen). After incubation, cells

were washed two times in 1× PBS to remove excess stain with a centrifugation step of 5 min at 2000g. The centrifuged cells were incubated with PBT (1× PBS containing 1%BSA and 0.1% Triton X-100) for 30 min at room temperature. PBT was removed and cells were incubated for 1 h in the dark with anti-TEP1 Polyclonal antibody (1mg/ml, 1:1000 dilution) coupled by FITC fast Conjugation Kit (abcam). And then, cells were run on a BD FACSCanto II cytometer (BD Biosciences), according to the previous flow cytometry condition for establishment of threshold values for gating<sup>1,2</sup>. Smaller cells or larger than single cells were ruled out. Following preliminary gating for cell size, the second gating was based on WGA signals, cell populations were distinguished by WGA and DRAQ5 or fluorescent FluoSpheres signals. Next, the expression difference of TEP1 in cell populations was discriminated by coupling FITC signal.

### **RNA-Seq and differential gene expression analysis**

On day 7 after blood feeding, TRIzol™ Reagent (Thermo Fisher Scientific) was used to extract total RNA from a pool of 15 whole mosquitoes infected with CSP<sub>wt</sub> or CSP<sub>mut</sub> parasites. High-quality RNA samples were subsequently submitted to Sangon Biotech Co., Ltd. (Shanghai, China) for RNA-sequencing and data analysis. Clean reads were mapped to the reference genome downloaded from VectorBase (Anopheles\_stephensi\_Astel2 genome)<sup>3</sup>, using HISAT2 v2.0 (<http://daehwankimlab.github.io/hisat2/>) with default parameters. Transcripts per million (TPM) analysis eliminated the influence of gene lengths and sequencing discrepancies, to enable direct comparison of gene expression between samples. DESeq2 v1.12.4 was used to determine differentially expressed genes (DEGs) between the two samples. Genes were considered to be significantly differentially expressed if the q-value < 0.001 and | fold change | > 1.2. Gene expression data are deposited in NCBI's Gene Expression Omnibus and is accessible through GEO Series accession number GSE176061 (<https://www.ncbi.nlm.nih.gov/geo/query/acc.cgi?acc=GSE176061>). DEGs were validated using qPCR as described above, and the primer sequences are shown in Supplementary Table 2. Differently expressed genes in supplementary Figure.6a and 7a were listed in Supplementary Table 4.

### **The parasite load of CSP<sub>wt</sub> and CSP<sub>mut</sub> hemolymph sporozoites in HepG2-CD81 cells.**

At 12 day after infection with CSP<sub>wt</sub> or CSP<sub>mut</sub>-infected mosquito, hemolymph was perfused from the mosquitoes (n=60), as described above. Hemolymph sporozoites were collected with centrifugation at 12,000g for 10 min and resuspended in RPMI 1640 medium containing 2.5 µg/mL amphotericin B (Sangon Biotech, Shanghai, China), 100 units/ml penicillin, and 100 µg/ml streptomycin (Beyotime, Beijing, China). Sporozoites were counted and incubated with HepG2-CD81 cells (a gift from Prof. Jing Yuan, Xiamen University) at a ratio of 1:2. After infection with three hours, the supernatant was removed and added fresh culture medium with the three antibiotics as described above. For parasite burden analysis, HepG2-CD81 cells were collected at 42h after infection with CSP<sub>wt</sub> or CSP<sub>mut</sub> sporozoites and lysed with 1 mL Trizol (Invitrogen) according to the instructions. 2 µg RNA was used for first-strand cDNA synthesis with the PrimeScript™ RT reagent Kit with gDNA Eraser (Perfect Real Time) (Takara Bio Inc., Japan). The parasite load in the HepG2-CD81 cells was evaluated by Taqman PCR with primers and probes for *18S rRNA* and *GAPDH* (Supplementary Table 3) following the manufacturer's instructions for Premix EX Taq™ (Probe qPCR) (TAKARA). The relative parasite load was expressed as the ratio of *18S rRNA* to *GAPDH*.

#### **The motility test of hemolymph sporozoite**

To test the motility of hemolymph sporozoite, hemolymph was perfused from female mosquitoes from CSP<sub>wt</sub> or CSP<sub>mut</sub>-infected mosquitoes (12 days post-feeding), hemolymph sporozoite were collected with centrifugation at 12000g for 3 min and resuspended in PBS. Sporozoites were incubated for 30 min at 37°C with anti-CSP-C terminal antibody diluted (1:100) in PBS. Then, samples were washed 2 times with PBS and incubated for 30 min at 37°C with Alexa 488-conjugated secondary antibodies (Beyotime Biotech, Nantong, China) diluted (1:100) in PBS. Sporozoites were collected with centrifugation of 3 min at 12,000g and resuspended in PBS. The sporozoites were placed in hemocytometer and the motility of sporozoites was observed with fluorescence microscope (IX71, Olympus, Japan).

#### **References**

1. Kwon, H. & Smith, R. C. Chemical depletion of phagocytic immune cells in *Anopheles gambiae* reveals dual roles of mosquito hemocytes in anti-*Plasmodium* immunity. *Proc Natl Acad Sci U S A*.

**116**, 14119-14128 (2019).

2. Kwon, H., Mohammed, M., Franzen, O., Ankarklev, J. & Smith, R. C. Single-cell analysis of mosquito hemocytes identifies signatures of immune cell subtypes and cell differentiation. *ELife*. **10**, (2021).
3. Giraldo-Calderon, G. I. et al. VectorBase: an updated bioinformatics resource for invertebrate vectors and other organisms related with human diseases. *Nucleic Acids Res.* **43**, D707-D713 (2015).

Full blots and gels of results are shown

Fig.2f

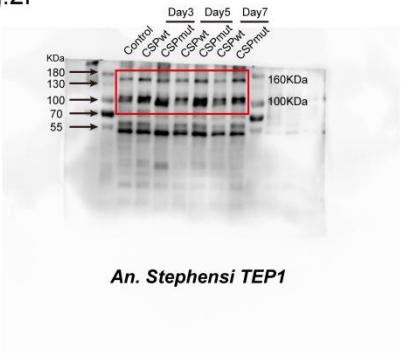

*An. Stephensi* TEP1

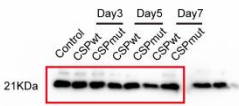

*An. Stephensi* S7

Fig.5a

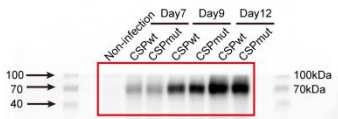

*P.y* CSP

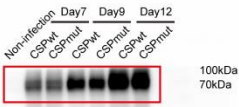

*P.y* HSP70

Fig.S1b

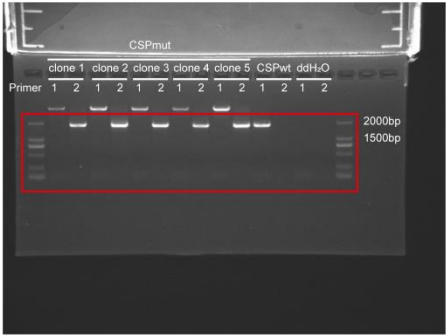

Fig.S10b

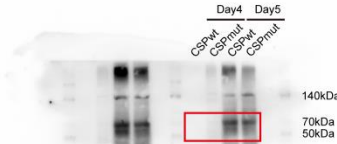

*P.y* CSP

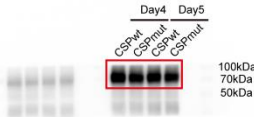

*P.y* HSP70
